# Supplementary material for: Targeting retinoic acid receptor alpha-corepressor interaction activates chaperone-mediated autophagy and protects against retinal degeneration
Source: PubMed Central journal article supplement (PMC9304322; doi:10.1038/s41467-022-31869-1), 2022-07-21
Supplement: 41467_2022_31869_MOESM1_ESM.pdf [file 41467_2022_31869_MOESM1_ESM.pdf]

**Targeting retinoic acid receptor alpha-corepressor interaction activates chaperone-mediated autophagy and protects against retinal degeneration**

Raquel Gomez-Sintes Qisheng Xin, Juan Ignacio Jiménez-Loygorri, Mericka McCabe, Antonio Diaz, Thomas P. Garner, Xiomaris M. Cotto-Rios, Yang Wu, Shuxian Dong, Cara A Reynolds, Bindi Patel, Pedro de la Villa, Fernando Macian, Patricia Boya\*, Eviropidis Gavathiotis\*, Ana Maria Cuervo\*

**Supplementary Figures 1 – 10**

**Supplementary Note (compound synthesis)**

**Supplementary Tables 1-2**

**Source Data**

- Supplementary Data file (raw data) in separate Excel File

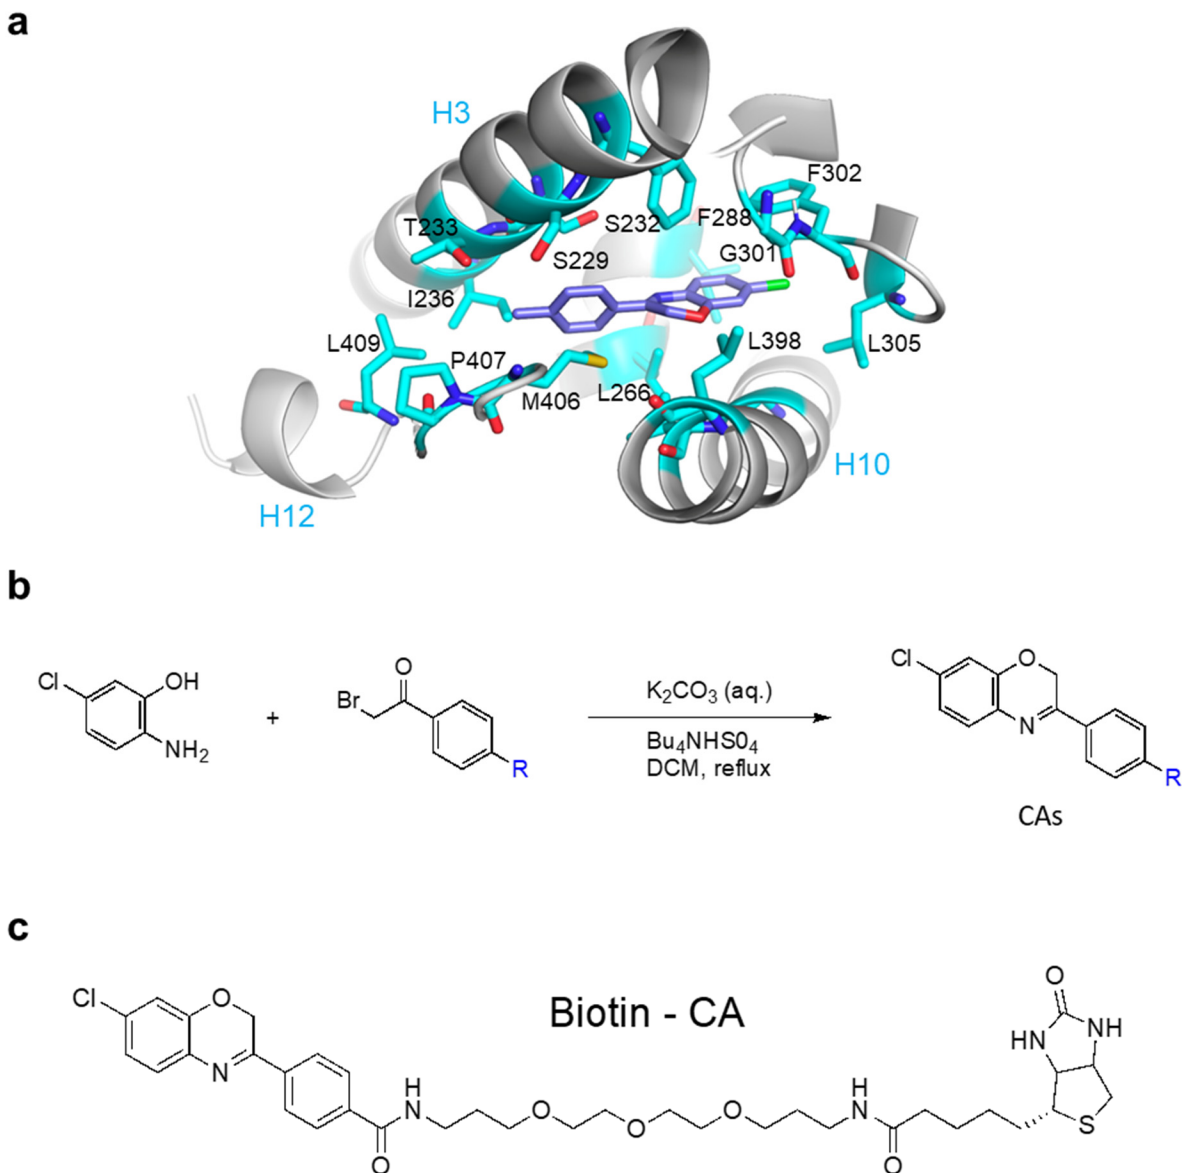

Supplementary Fig. 1. **Structure-based design and chemical synthesis of CMA activators (CA compounds).** **a.** A close view of the binding pose of AR7 (purple sticks) in the binding pocket of inactive RAR $\alpha$  in ribbon (grey) highlighting RAR $\alpha$  interacting residues in sticks (cyan). AR7 occupies a hydrophobic pocket present in the inactive RAR $\alpha$  formed by helices h3, h10 and h12. **b.** New CA compounds were designed and synthesized according to a synthetic approach varying R groups aiming to increase hydrophobic interactions or polar interactions within the RAR pocket residues. **c.** Conjugation of biotin to a CA compound to generate Biotin-CA compound that was used in the pull-down experiments.

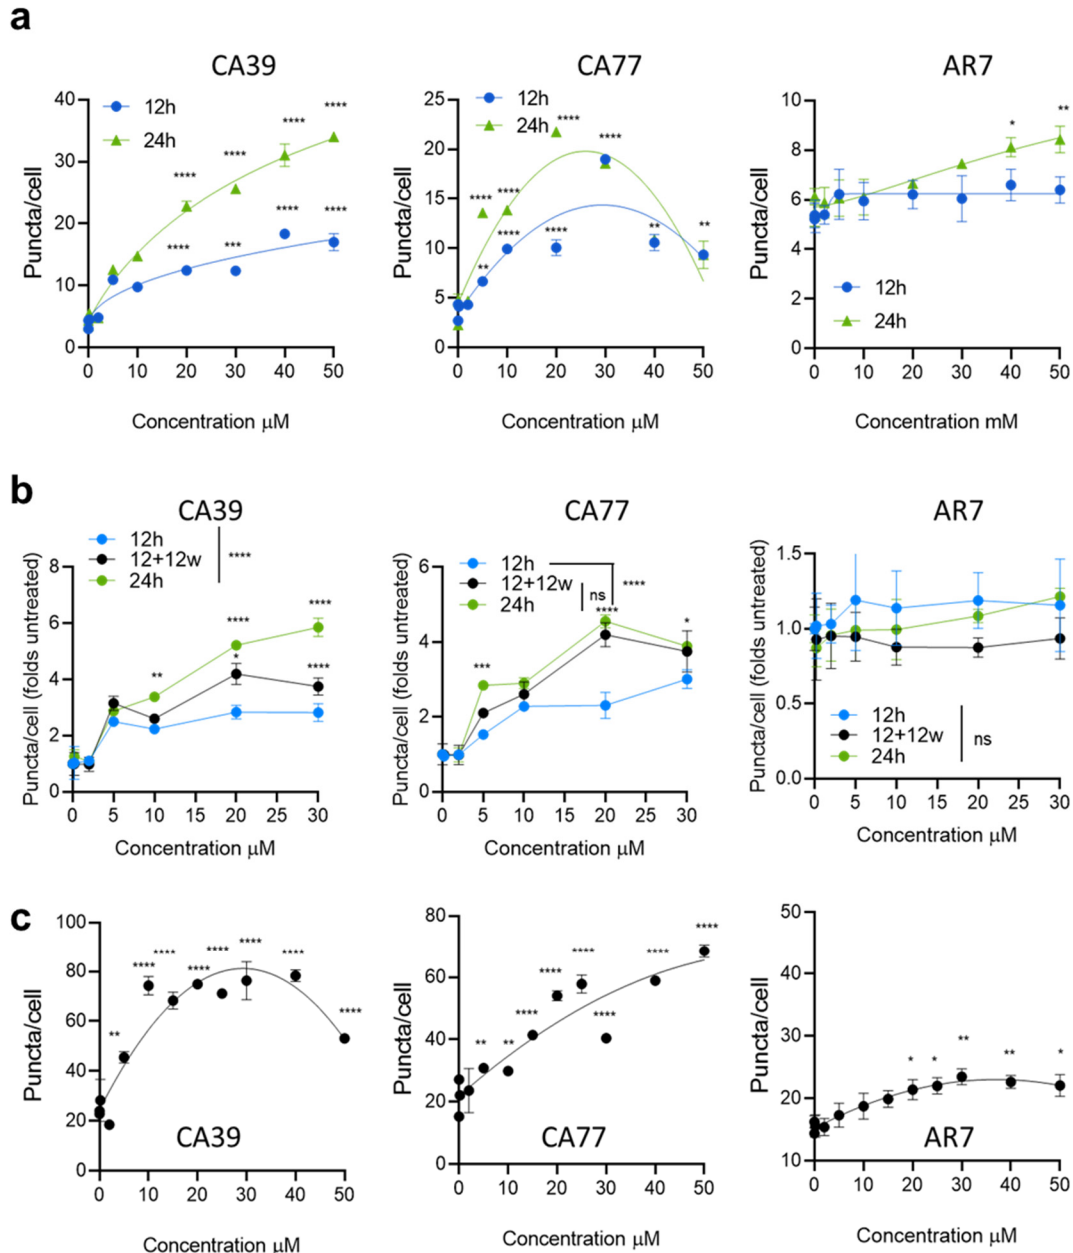

Supplementary Fig. 2. **Activation of CMA by CA39, CA77 and AR7 in different cell types. a,** CMA activity in neuroblastoma cell line N2a expressing the KFERQ-PS-Dendra reporter upon addition of increasing concentrations of CA39 (left), CA77 (center) or AR7 (right) for the indicated times (a) or 12 h after washing (w) them out from the media (b).  $n = 3$  independent experiments ( $>1,500$  cells counted). **c.** CMA activity in primary human fibroblast expressing the KFERQ-PS-Dendra reporter upon addition of increasing concentrations of CA39 (left), CA77 (center) or AR7 (right) for 24 h.  $n = 3$  independent experiments ( $>850$  cells counted). All values are mean+s.e.m. One-way ANOVA (a, c) or two-way ANOVA (b) followed by Bonferroni's multiple comparisons post-hoc test were used. Significant differences with untreated samples are indicated in a, c and among the different incubation protocols in b. \*\* $p < 0.01$ , \*\*\* $p < 0.001$ , \*\*\*\* $p < 0.0001$ . ns: not significant. Source data and exact p values are provided as a Source Data file.

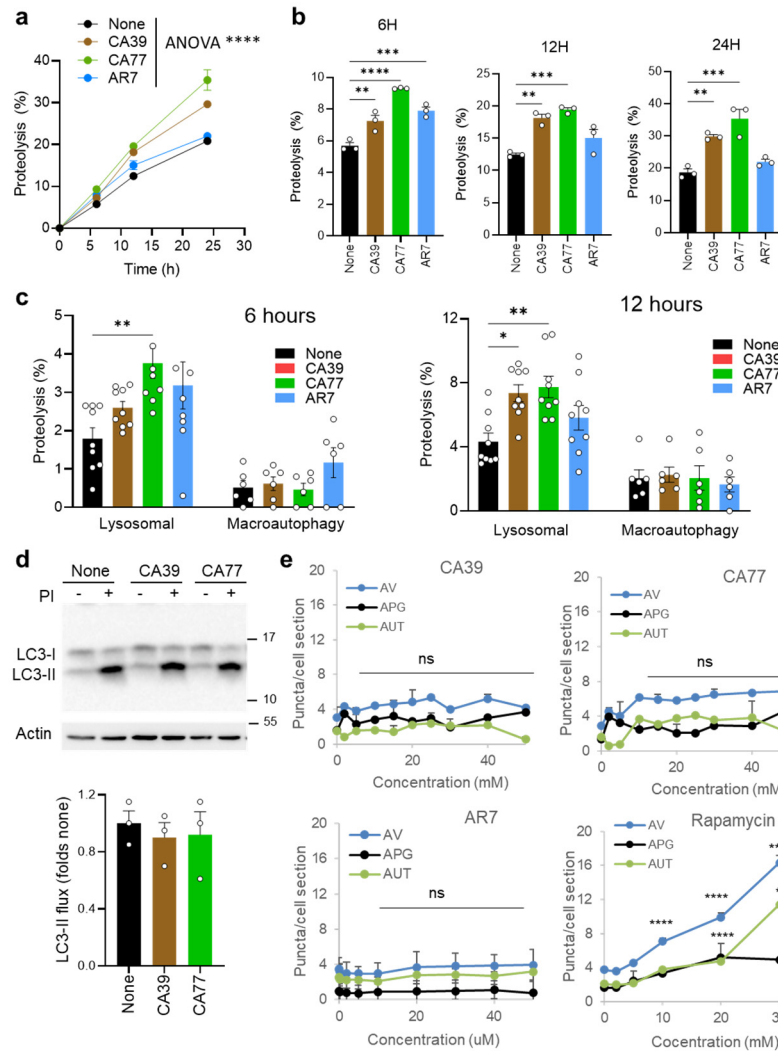

Supplementary Fig. 3. **Lack of effect of CA39 and CA77 on macroautophagy activity.** **a, b.** Proteolysis of long half-life intracellular proteins in NIH3T3 without additions (None) or cultured in the presence of 10  $\mu$ M CA39, CA77 or AR7 for the indicated times. Proteolysis rates at the indicated times are shown in **b**.  $n = 3$  independent experiments with triplicate wells. **c.** Proteolysis of long half-life intracellular proteins in cells incubated with  $\text{NH}_4\text{Cl}$ /Leupeptin to calculate the percentage of lysosomal-dependent proteolysis or with MRT o clacualte macroautophagy-dependent proteolysis.  $n = 3$  independent experiments with triplicate wells. **d.** Immunoblot for LC3 in NIH3T3 incubated with 20  $\mu$ M CA39 or CA77 for 16h in presence or not of lysosomal protease inhibitors (PI) added in the last 6h of the experiment. Representative immunoblot (left) and quantification of the rate of degradation of LC3-II (flux) relative to that in untreated (None) cells (right).  $n = 4$  independent experiments. **e.** Quantification of macroautophagy activity in NIH3T3 cells stably expressing the mCherry-GFP-LC3 reporter and treated with increasing concentrations of CA39, CA77, AR7 or the macroautophagy activator rapamycin for 16h. Quantification of the amount of mCherry<sup>+</sup> puncta (autophagic vacuoles, AV), mCherry<sup>+</sup>GFP<sup>+</sup> puncta (autophagosomes, APG) and mCherry<sup>+</sup>GFP<sup>-</sup> puncta (autolysosomes, AUT).  $n = 3$  different experiments (>1,100 cells counted). All values are mean+s.e.m. One-way ANOVA (**b,d**) or two-way ANOVA (**a,c,e**) followed by Bonferroni's multiple comparisons post-hoc test (**a**) were used. A. \* $p < 0.05$ , \*\* $p < 0.01$  \*\*\* $p < 0.001$  and \*\*\*\* $p < 0.0001$ . ns: not significant. Uncropped blots are in Supplementary Fig. 1. Source data and exact p values are provided as a Source Data file.

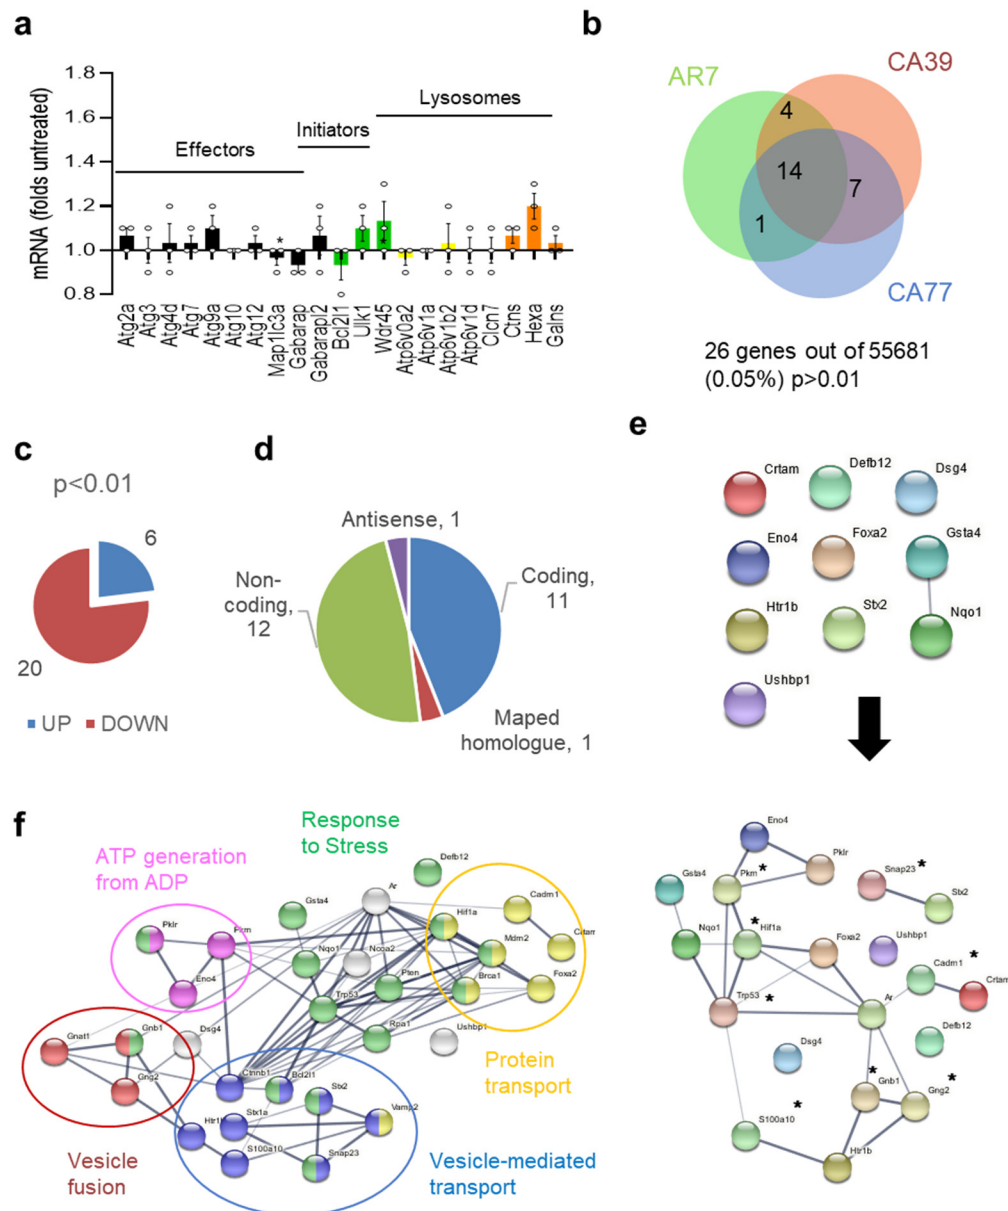

Supplementary Fig. 4. **Transcriptional changes induced by CA compounds.** **a.** AR7 induced changes in the expression of the indicated components of the CLEAR network (macroautophagy and lysosomal examples shown). Values are expressed relative to untreated cells and are mean $\pm$ s.e.m.  $n = 3$  different experiments. **b.** Venn diagram of the additional genes (beside those in the CMA network) showing significant ( $p < 0.01$ ) changes in expression in cells treated with the indicated compounds. **c.** Fraction of genes significantly ( $p < 0.01$ ) upregulated or downregulated upon treatment with AR7, CA39 and CA77. **d.** Types of transcripts with modified expression upon treatment with AR7, CA39 and CA77. **e.** Proteins coded by the genes significantly changing upon treatment with AR7, CA39 and CA77. Below shows their clustering upon gene set enrichment and node expansion analysis (using STRING database). \*: proteins added through node expansion. **f.** Functional groups of the nodes assigned to the 11 proteins with expression changed upon treatment with AR7, CA39 and CA77. One sample t and Wilcoxon test was used in **a** and unpaired two tails t-test (**c**). \* $p < 0.05$ . Source data and exact p values are provided as a Source Data file.



**a**

| Product Name | Batch Name | Solubility        |                                    | Metabolic Stability |                 | Permeability |              | Comments                                                                                 |
|--------------|------------|-------------------|------------------------------------|---------------------|-----------------|--------------|--------------|------------------------------------------------------------------------------------------|
|              |            | Media Description | Minimal Soluble Concentration (µM) | Species             | Calculated % MF | Fab%         | Efflux Ratio |                                                                                          |
| CA39         | 20140811   | A                 | 2.0                                | Human               | 100             | 0.00         | 0.706        | Low solubility; High metabolic stability (in human); Very low permeability.              |
| CA39         | 20140811   | B                 | 2.0                                | Mouse               | 47              |              |              |                                                                                          |
| CA39         | 20140811   | C                 | 10.0                               | Rat                 | 70              |              |              |                                                                                          |
| CA77         | 20140811   | A                 | 20.0                               | Human               | 23              | 92.0         | 2.452        | Intermediate solubility; Intermediate metabolic stability (in human); High permeability. |
| CA77         | 20140811   | B                 | 10.0                               | Mouse               | 33              |              |              |                                                                                          |
| CA77         | 20140811   | C                 | 20.0                               | Rat                 | 40              |              |              |                                                                                          |

**b****CA39****CA77**

|                                                                                                                                                                                                                                                                                                                                                                                                                                                                                                                                                                                                                                                                                                                                                                                                                                                                                                                                                                                                                                                                                                                                                                                                                                                                                                                                                                                                                                                                                                                                                                                                                                                                                                                                                                                                                                                                                                                                                                                                                                                                                                                                                                                                                                                                                                                                                                                                                                  |                                                                                                                                                                                                                                                                                                                                                                                                                                                                                                                                                                                                                                                                                                                                                                                                                                                                                                                                                                                                                                                                                                                                                                                                                                                                                                                                                                                                                                                                                                                                                                                                                                                                                                                                                                                                                                                                                                                                                                                                                                                                                                                                                                                                                                                                                                                                                                                                                                 |
|----------------------------------------------------------------------------------------------------------------------------------------------------------------------------------------------------------------------------------------------------------------------------------------------------------------------------------------------------------------------------------------------------------------------------------------------------------------------------------------------------------------------------------------------------------------------------------------------------------------------------------------------------------------------------------------------------------------------------------------------------------------------------------------------------------------------------------------------------------------------------------------------------------------------------------------------------------------------------------------------------------------------------------------------------------------------------------------------------------------------------------------------------------------------------------------------------------------------------------------------------------------------------------------------------------------------------------------------------------------------------------------------------------------------------------------------------------------------------------------------------------------------------------------------------------------------------------------------------------------------------------------------------------------------------------------------------------------------------------------------------------------------------------------------------------------------------------------------------------------------------------------------------------------------------------------------------------------------------------------------------------------------------------------------------------------------------------------------------------------------------------------------------------------------------------------------------------------------------------------------------------------------------------------------------------------------------------------------------------------------------------------------------------------------------------|---------------------------------------------------------------------------------------------------------------------------------------------------------------------------------------------------------------------------------------------------------------------------------------------------------------------------------------------------------------------------------------------------------------------------------------------------------------------------------------------------------------------------------------------------------------------------------------------------------------------------------------------------------------------------------------------------------------------------------------------------------------------------------------------------------------------------------------------------------------------------------------------------------------------------------------------------------------------------------------------------------------------------------------------------------------------------------------------------------------------------------------------------------------------------------------------------------------------------------------------------------------------------------------------------------------------------------------------------------------------------------------------------------------------------------------------------------------------------------------------------------------------------------------------------------------------------------------------------------------------------------------------------------------------------------------------------------------------------------------------------------------------------------------------------------------------------------------------------------------------------------------------------------------------------------------------------------------------------------------------------------------------------------------------------------------------------------------------------------------------------------------------------------------------------------------------------------------------------------------------------------------------------------------------------------------------------------------------------------------------------------------------------------------------------------|
| <p>Primary Metabolites &amp; Reactive FGs:<br/>&gt; Metabolism likely: benzylic-like H -&gt; alcohol</p> <p>Principal Descriptors: (Range 95% of Drugs)</p> <p>Solute Molecular Weight = 319.790 (130.0 / 725.0)</p> <p>Solute Dipole Moment (D) = 3.548 ( 1.0 / 12.5)</p> <p>Solute Total SASA = 580.127 (300.0 / 1000.0)</p> <p>Solute Hydrophobic SASA = 42.169 ( 0.0 / 750.0)</p> <p>Solute Hydrophilic SASA = 8.276 ( 7.0 / 330.0)</p> <p>Solute Carbon Pi SASA = 458.081 ( 0.0 / 450.0)*</p> <p>Solute Weakly Polar SASA = 71.602 ( 0.0 / 175.0)</p> <p>Solute Molecular Volume (A<sup>3</sup>)= 996.627 (500.0 / 2000.0)</p> <p>Solute vdW Polar SA (PSA) = 18.774 ( 7.0 / 200.0)</p> <p>Solute No. of Rotatable Bonds= 1.000 ( 0.0 / 15.0)</p> <p>Solute as Donor - Hydrogen Bonds = 0.000 ( 0.0 / 6.0)</p> <p>Solute as Acceptor - Hydrogen Bonds = 1.750 ( 2.0 / 20.0)*</p> <p>Solute Globularity (Sphere = 1) = 0.832 ( 0.75 / 0.95)</p> <p>Solute Ionization Potential (eV) = 8.791 ( 7.9 / 10.5)</p> <p>Solute Electron Affinity (eV) = 1.030 ( -0.9 / 1.7)</p> <p>Predictions for Properties:</p> <p>QP Polarizability (Angstroms<sup>3</sup>) = 37.464M ( 13.0 / 70.0)</p> <p>QP log P for hexadecane/gas = 11.215M ( 4.0 / 18.0)</p> <p>QP log P for octanol/gas = 13.599M ( 8.0 / 35.0)</p> <p>QP log P for water/gas = 5.816M ( 4.0 / 45.0)</p> <p>QP log P for octanol/water = 5.755 ( -2.0 / 6.5)</p> <p>QP log S for aqueous solubility = -6.444 ( -6.5 / 0.5)</p> <p>QP log S - conformation independent = -6.306 ( -6.5 / 0.5)</p> <p>QP log K hsa Serum Protein Binding = 1.001 ( -1.5 / 1.5)</p> <p>QP log BB for brain/blood = 0.599 ( -3.0 / 1.2)</p> <p>No. of Primary Metabolites = 1 ( 1.0 / 8.0)</p> <p>Predicted CNS Activity (- to ++) = ++</p> <p>HERG K+ Channel Blockage: log IC50 = -6.439 (concern below -5)</p> <p>Apparent Caco-2 Permeability (nm/sec) = 8268 (&lt;25 poor, &gt;500 great)</p> <p>Apparent MDCK Permeability (nm/sec) = 10000 (&lt;25 poor, &gt;500 great)</p> <p>QP log Kp for skin permeability = 0.038 (Kp in cm/hr)</p> <p>Jm, max transdermal transport rate = 0.126 (micrograms/cm<sup>2</sup>-hr)</p> <p>Lipinski Rule of 5 Violations = 1 (maximum is 4)</p> <p>Jorgensen Rule of 3 Violations = 1 (maximum is 3)</p> <p>% Human Oral Absorption in GI (+-20%) = 100 (&lt;25% is poor)</p> <p>Qual. Model for Human Oral Absorption = low (&gt;80% is high)</p> | <p>Primary Metabolites &amp; Reactive FGs:<br/>&gt; Metabolism likely: benzylic-like H -&gt; alcohol</p> <p>Principal Descriptors: (Range 95% of Drugs)</p> <p>Solute Molecular Weight = 300.744 (130.0 / 725.0)</p> <p>Solute Dipole Moment (D) = 6.762 ( 1.0 / 12.5)</p> <p>Solute Total SASA = 551.791 (300.0 / 1000.0)</p> <p>Solute Hydrophobic SASA = 136.573 ( 0.0 / 750.0)</p> <p>Solute Hydrophilic SASA = 65.923 ( 7.0 / 330.0)</p> <p>Solute Carbon Pi SASA = 277.694 ( 0.0 / 450.0)</p> <p>Solute Weakly Polar SASA = 71.602 ( 0.0 / 175.0)</p> <p>Solute Molecular Volume (A<sup>3</sup>)= 926.680 (500.0 / 2000.0)</p> <p>Solute vdW Polar SA (PSA) = 56.391 ( 7.0 / 200.0)</p> <p>Solute No. of Rotatable Bonds= 1.000 ( 0.0 / 15.0)</p> <p>Solute as Donor - Hydrogen Bonds = 1.000 ( 0.0 / 6.0)</p> <p>Solute as Acceptor - Hydrogen Bonds = 4.250 ( 2.0 / 20.0)</p> <p>Solute Globularity (Sphere = 1) = 0.833 ( 0.75 / 0.95)</p> <p>Solute Ionization Potential (eV) = 8.755 ( 7.9 / 10.5)</p> <p>Solute Electron Affinity (eV) = 0.980 ( -0.9 / 1.7)</p> <p>Predictions for Properties:</p> <p>QP Polarizability (Angstroms<sup>3</sup>) = 32.942M ( 13.0 / 70.0)</p> <p>QP log P for hexadecane/gas = 9.883M ( 4.0 / 18.0)</p> <p>QP log P for octanol/gas = 15.306M ( 8.0 / 35.0)</p> <p>QP log P for water/gas = 8.840M ( 4.0 / 45.0)</p> <p>QP log P for octanol/water = 3.455 ( -2.0 / 6.5)</p> <p>QP log S for aqueous solubility = -5.043 ( -6.5 / 0.5)</p> <p>QP log S - conformation independent = -4.523 ( -6.5 / 0.5)</p> <p>QP log K hsa Serum Protein Binding = 0.278 ( -1.5 / 1.5)</p> <p>QP log BB for brain/blood = 0.046 ( -3.0 / 1.2)</p> <p>No. of Primary Metabolites = 1 ( 1.0 / 8.0)</p> <p>Predicted CNS Activity (- to ++) = +</p> <p>HERG K+ Channel Blockage: log IC50 = -5.558 (concern below -5)</p> <p>Apparent Caco-2 Permeability (nm/sec) = 2348 (&lt;25 poor, &gt;500 great)</p> <p>Apparent MDCK Permeability (nm/sec) = 3071 (&lt;25 poor, &gt;500 great)</p> <p>QP log Kp for skin permeability = -1.660 (Kp in cm/hr)</p> <p>Jm, max transdermal transport rate = 0.071 (micrograms/cm<sup>2</sup>-hr)</p> <p>Lipinski Rule of 5 Violations = 0 (maximum is 4)</p> <p>Jorgensen Rule of 3 Violations = 0 (maximum is 3)</p> <p>% Human Oral Absorption in GI (+-20%) = 100 (&lt;25% is poor)</p> <p>Qual. Model for Human Oral Absorption = HIGH (&gt;80% is high)</p> |
|----------------------------------------------------------------------------------------------------------------------------------------------------------------------------------------------------------------------------------------------------------------------------------------------------------------------------------------------------------------------------------------------------------------------------------------------------------------------------------------------------------------------------------------------------------------------------------------------------------------------------------------------------------------------------------------------------------------------------------------------------------------------------------------------------------------------------------------------------------------------------------------------------------------------------------------------------------------------------------------------------------------------------------------------------------------------------------------------------------------------------------------------------------------------------------------------------------------------------------------------------------------------------------------------------------------------------------------------------------------------------------------------------------------------------------------------------------------------------------------------------------------------------------------------------------------------------------------------------------------------------------------------------------------------------------------------------------------------------------------------------------------------------------------------------------------------------------------------------------------------------------------------------------------------------------------------------------------------------------------------------------------------------------------------------------------------------------------------------------------------------------------------------------------------------------------------------------------------------------------------------------------------------------------------------------------------------------------------------------------------------------------------------------------------------------|---------------------------------------------------------------------------------------------------------------------------------------------------------------------------------------------------------------------------------------------------------------------------------------------------------------------------------------------------------------------------------------------------------------------------------------------------------------------------------------------------------------------------------------------------------------------------------------------------------------------------------------------------------------------------------------------------------------------------------------------------------------------------------------------------------------------------------------------------------------------------------------------------------------------------------------------------------------------------------------------------------------------------------------------------------------------------------------------------------------------------------------------------------------------------------------------------------------------------------------------------------------------------------------------------------------------------------------------------------------------------------------------------------------------------------------------------------------------------------------------------------------------------------------------------------------------------------------------------------------------------------------------------------------------------------------------------------------------------------------------------------------------------------------------------------------------------------------------------------------------------------------------------------------------------------------------------------------------------------------------------------------------------------------------------------------------------------------------------------------------------------------------------------------------------------------------------------------------------------------------------------------------------------------------------------------------------------------------------------------------------------------------------------------------------------|

Supplementary Fig. 5. **In vitro** and **in silico** ADME of CA compounds. **a.** In vitro solubility, metabolic stability (in liver microsomes from the indicated species) and permeability evaluation of CA39 and CA77, see Methods for experimental conditions. Comments on properties were added by an observer blinded to the nature of the compounds and the study. **b.** *In silico* QikProp (Schrödinger, LLC) analysis and ADME predictions for CA39 (left) and CA77 (right). MF: microsomal fraction; Fab: absorption; FG: functional groups; SASA: solvent-accessible surface area; PSA: polar surface area; eV: electron volts; QP: QikProp (Schrödinger, LLC QikProp derived value); MDCK: Madin-Darby Canine Kidney (Cells); Kp: skin permeability coefficient; Jm: predicted maximum transdermal transport rate; vdW: van der Waals; ADME: Absorption, distribution, metabolism, and excretion.

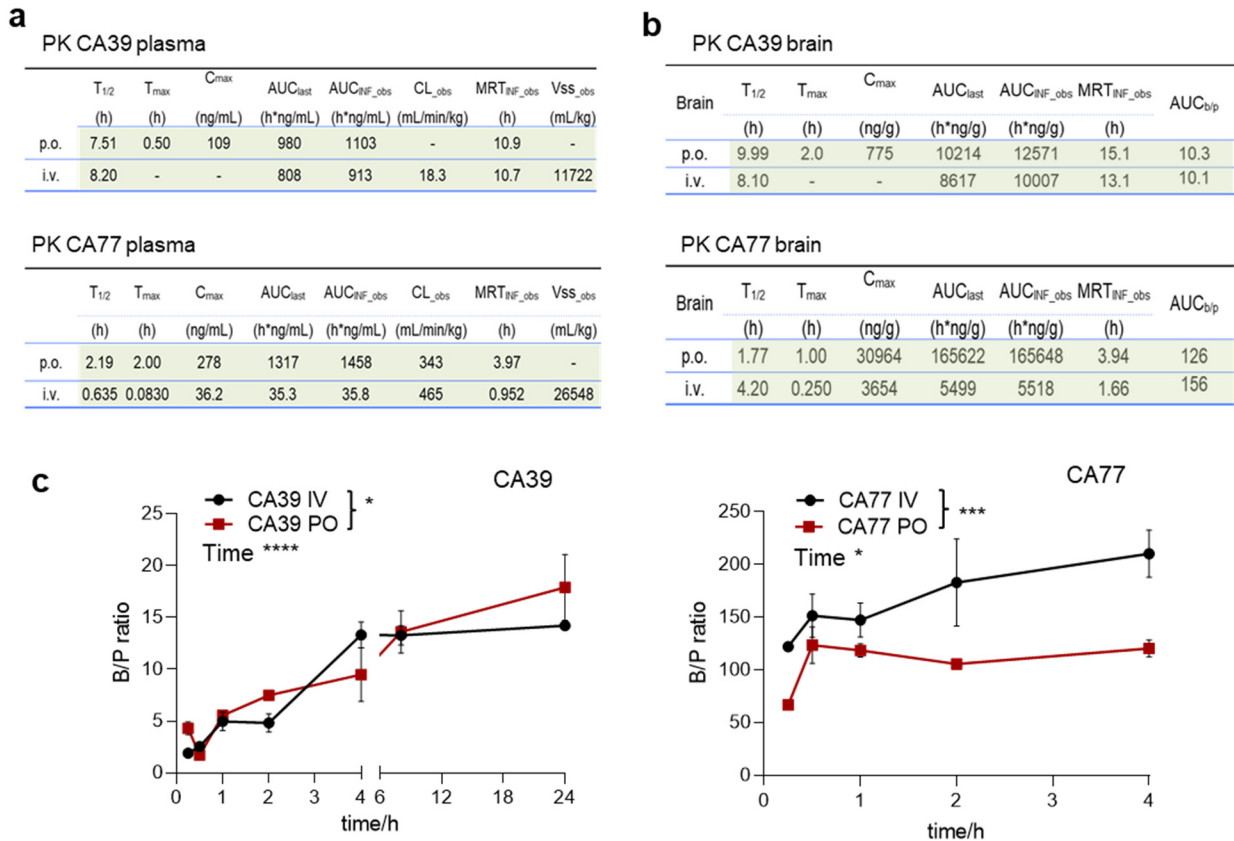

Supplementary Fig. 6. **CA compounds have favorable blood brain barrier penetration and pharmacokinetics.** **a, b.** Pharmacokinetics (PK) parameters of CA39 and CA77 in plasma (**a**) and brain (**b**) after p.o. (oral, 30 mg/kg bw) and i.v. (intravenous, 1 mg/kg bw) administration in mice. **c.** Brain to plasma (B/P) ratio of CA39 and CA77 at the indicated times after administration by i.v. or p.o. as in **a**.  $n = 3$  mice per time point. All values are mean+s.e.m. Two-way ANOVA followed by Sidak's multiple comparisons post-hoc test was used in **c**. \*  $p < 0.05$ , \*\*\* $p < 0.001$  and \*\*\*\* $p < 0.0001$ . ns: not significant. Source data and exact p values are provided as a Source Data file.

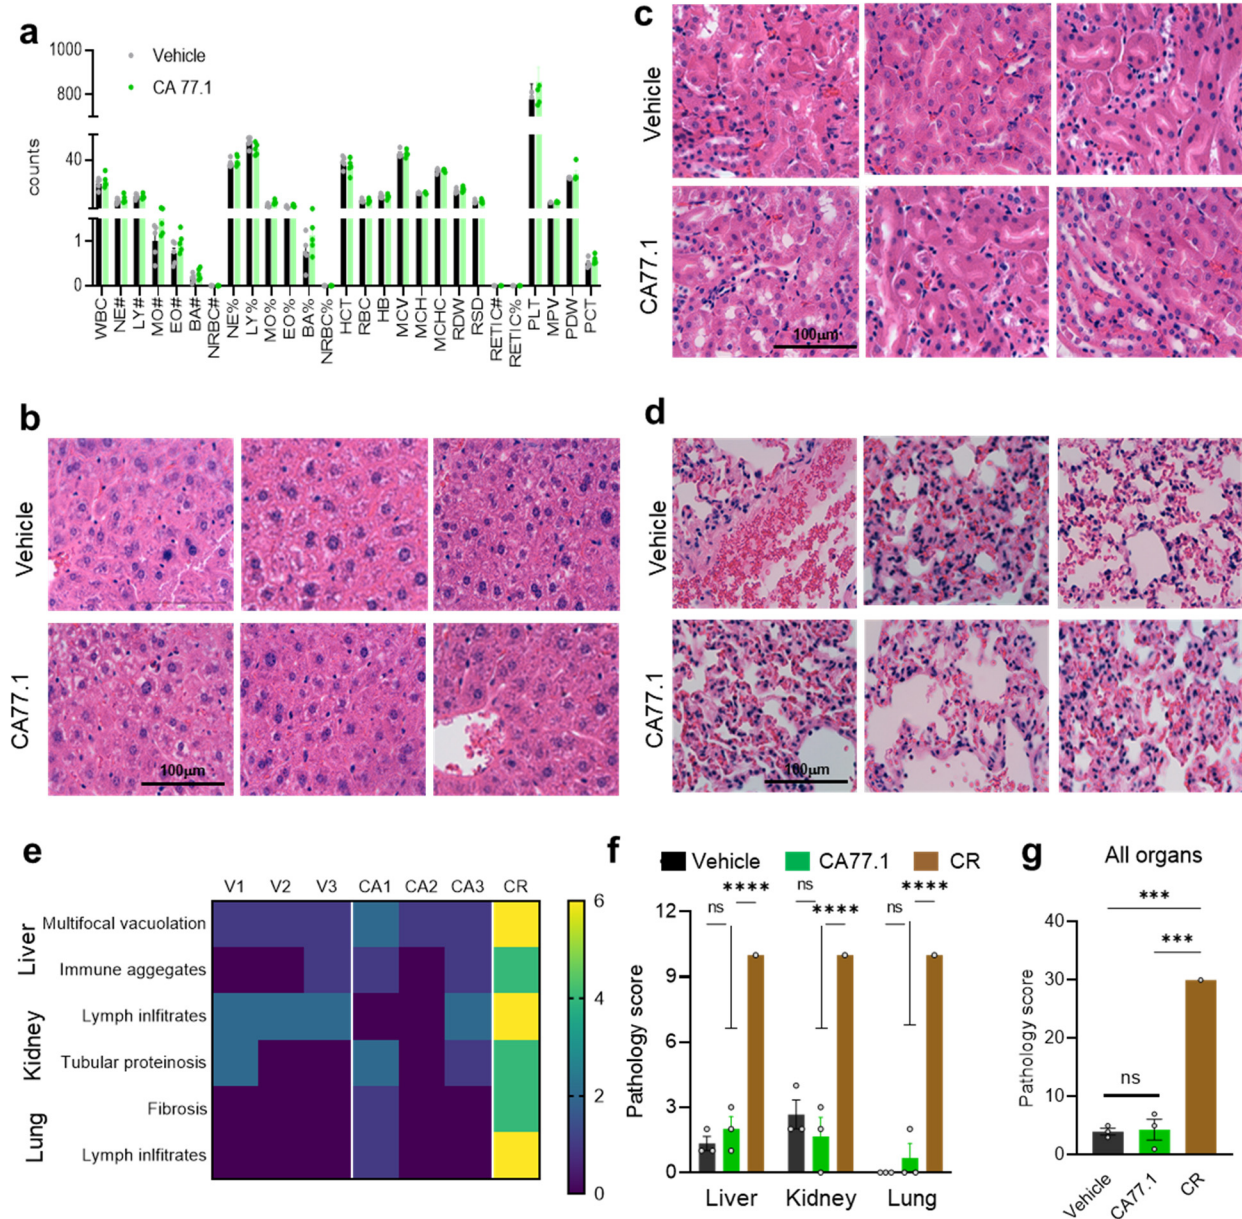

Supplementary Fig. 7. **Toxicity assessment of the CA compounds *in vivo*.** **a.** Mouse blood count at the end of a 5 month daily oral administration of vehicle (Veh) or a CA77 structure analogue (CA77.1). Values are mean+s.e.m. from  $n = 6$  mice in each group. **b-d.** Representative images of sections of H&E stained liver (b), kidney (c) and lung (d) sections from the same mice.  $n = 5$  mice. All values are mean+s.e.m. Two-way ANOVA followed by Bonferroni's multiple comparisons post-hoc test and unpaired t test were both applied on A and no statistical differences were noted between vehicle and CA treated mice. **e-g.** Pathology scoring of the identified features in the three organs. Clinical relevant (CR) values are depicted as reference. Heat map of the individual features per organ (**e**), average scoring of all the features in each organ (**f**) or average of histological features per animal (**g**) are shown.  $n = 3$  mice per group. All values are mean+s.e.m. Two-way ANOVA (**f**) or one-way ANOVA (**g**) followed by Tukeys' multiple comparisons post-hoc test were used. \*\*\* $p < 0.001$  and \*\*\*\* $p < 0.0001$ . ns: not significant. Source data and exact p values are provided as a Source Data file.



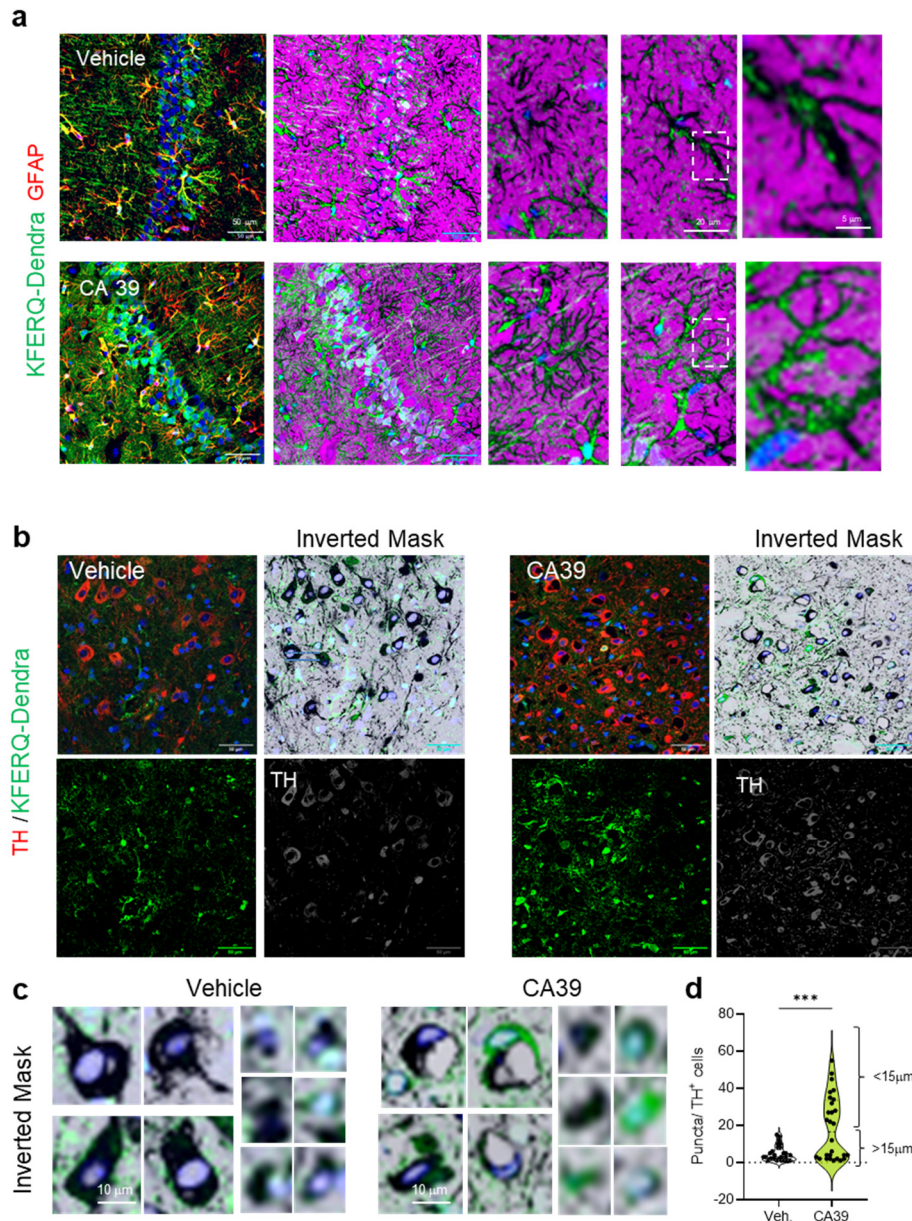

Supplementary Fig. 8. **Effect of CMA compounds on CMA activity of different brain cells *in vivo*.** **a.** Representative images of hippocampus (CA1 region) from the KFERQ-Dendra mice i.p. injected with vehicle or CA39 daily (30 mg/kg bw) for three consecutive days co-stained with GFAP. Merged channels (left) and inverted mask for the GFAP channel (right) to better appreciate Dendra<sup>+</sup> puncta are shown. Insets: single cells at boxed area at higher magnification. **b.** Representative images of midbrain substantia nigra regions from the same mice as in **a** co-stained with TH. Merged and individual channels are shown. Top right shows inverted mask for the TH channel to better appreciate Dendra<sup>+</sup> puncta. **c.** Higher magnification of examples of large (left) and small (right) TH<sup>+</sup> cells from the inverted mask images in **a**. **d.** Violin plot of the quantification of the number of Dendra<sup>+</sup> puncta in individual TH<sup>+</sup> cells from images as in **a**. Average sizes for neurons in the >15 $\mu$ m group was 22.4 $\pm$ 2.1  $\mu$ m and in the <15 $\mu$ m group was 9.1 $\pm$ 0.4  $\mu$ m. n = 20. cells per group. Two-sided t-test was used in **d**. \*\*\*p<0.001. Source data and exact p values are provided as a Source Data file.

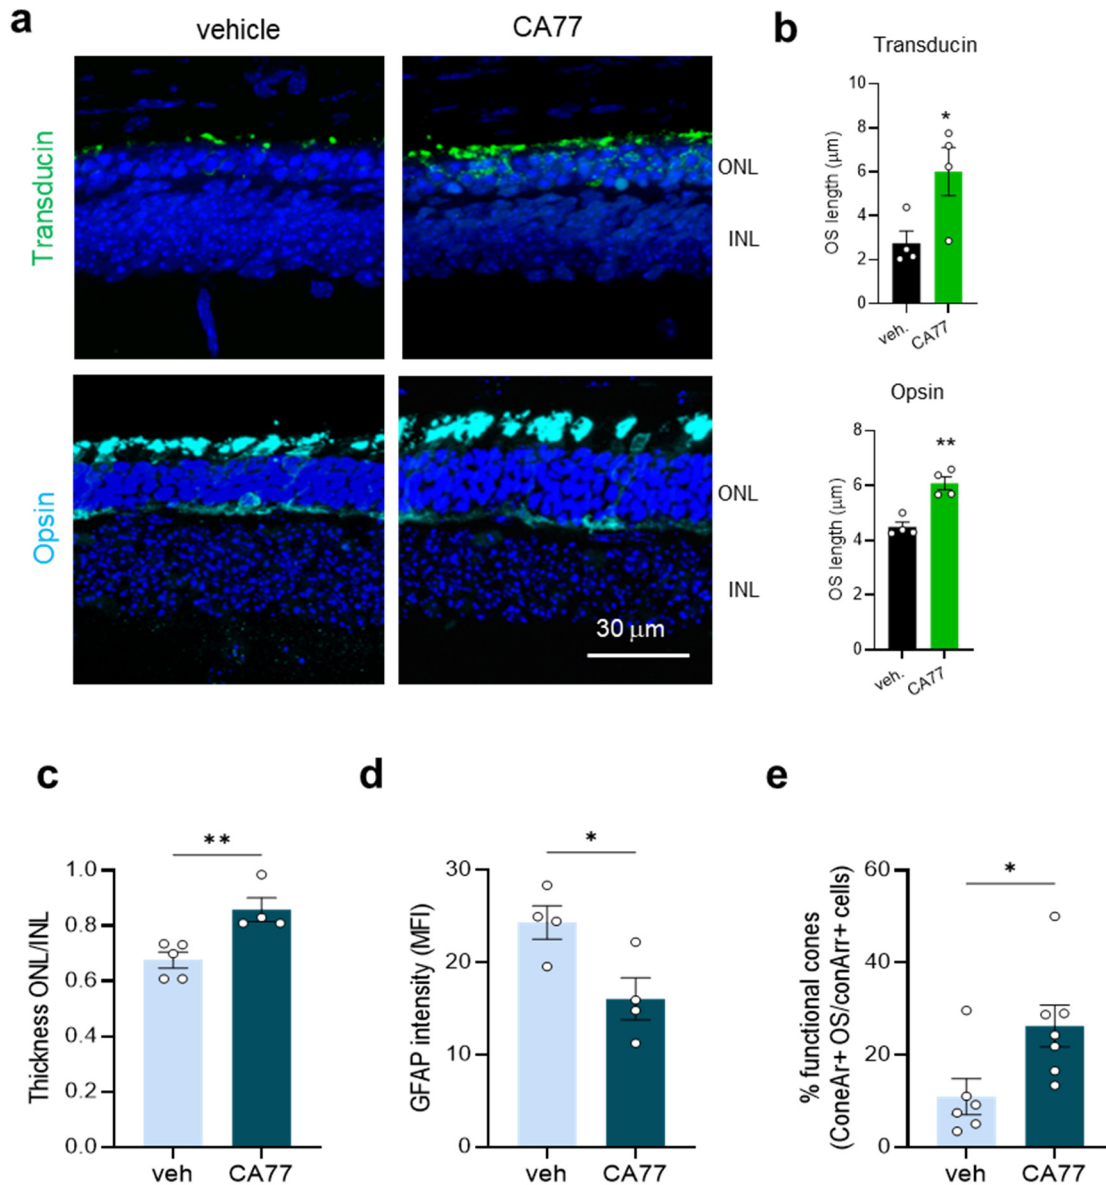

Supplementary Fig. 9. **Effect of CA compounds in rd10 retinas.** **a, b.** Rod (transducin) and cone (opsin) markers in temporal central retina of rd10 treated from P18 to P25 with daily i.p. injection of vehicle only or 40 mg/kg bw of CA77.  $n = 8$  (vehicle) and  $9$  (CA treated), from 3 independent experiments. Representative images (**a**) and quantification of outer segment (OS) length (**b**) measured in the whole retina with the markers used in **a**. Nuclei are highlighted with DAPI.  $n = 4$  areas per animal, 4 mice per condition. **c-e.** Ratio of thickness of the outer and inner layers measured in plastic embedded sections after toluidine blue staining (**c**), intensity of GFAP staining (**d**) percentage of functional cones calculated as number of outer segment/number of somas in cone arrestin staining (**e**) of the retinas of rd10 mice 7 days after single intravitreal injection of CA77 (40  $\mu$ M) at P18.  $n = 5$  veh 4 CA77 (**c**), 4 (**d**), 6 veh 7 CA77 (**e**) Individual values and mean+s.e.m. are shown. Two-sided unpaired t test in **c** and **e** and two-sided Mann-Whitney test in **d** were used. \*  $p < 0.05$  and \*\* $p < 0.01$ . Source data and exact p values are provided as a Source Data file.

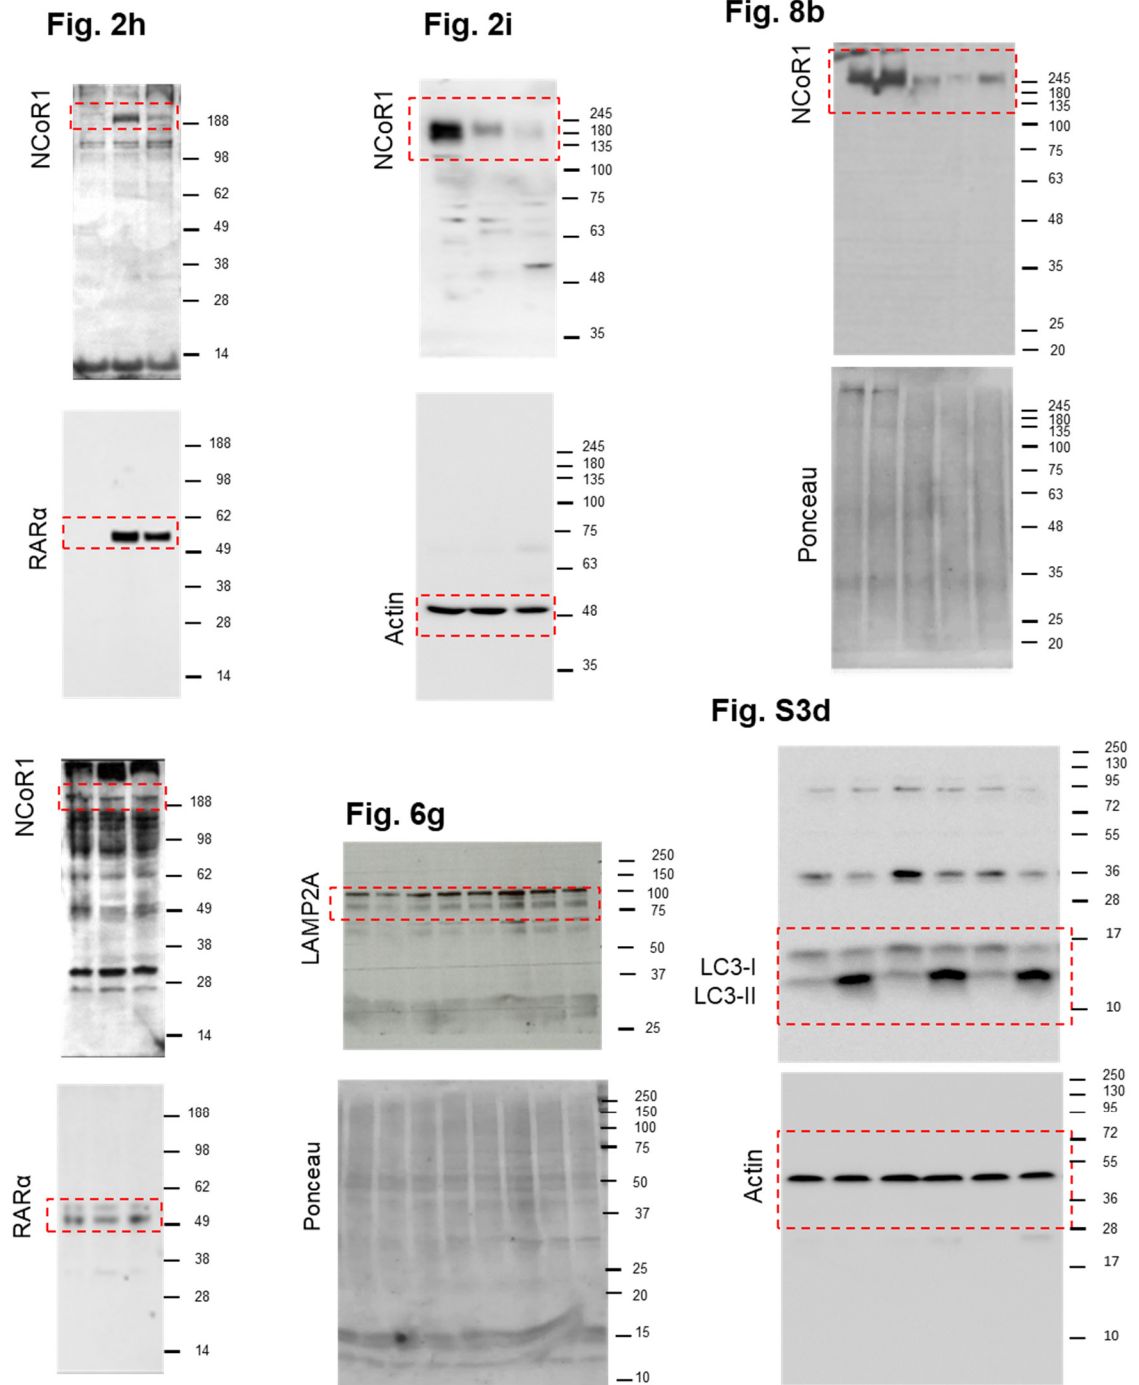

Supplementary Fig. 10. **Uncropped gels from main and supplementary figures.** Uncropped images of the immunoblots shown in main and supplementary figures. The image in the figures is marked with a red dotted box. Molecular weight markers (in kDa) are shown on the right

**Supplementary Note**

Synthesis of 7-chloro-3-(p-tolyl)-2H-benzo[b][1,4]oxazine (AR7):

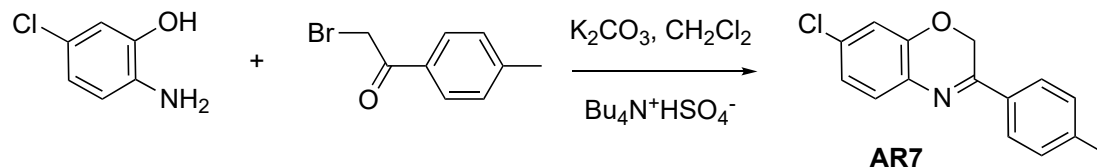

Preparation of AR7 was as described before <sup>11</sup>. Briefly, 2-bromo-4-chloroacetophenone (0.01 mol) in dichloromethane was added drop-wise to a solution of 2-aminophenol in dichloromethane, aqueous potassium carbonate (20% w/v) and tetrabutylammonium hydrogen sulphate (0.0005 mol). The resulting mixture was refluxed till completion for 4–6 h and the organic layer was extracted with dichloromethane and dried over sodium sulphate evaporated in vacuum to give a crude solid product. The solid was then recrystallized with hot ethanol to obtain pure yield 95%.

AR7 : <sup>1</sup>H NMR (300 MHz, CDCl<sub>3</sub>): δ = 2.44 (s, 3H), 5.09 (s, 2H), 6.91-6.98 (m, 2H), 7.12 (d, J = 12Hz, 2H), 7.33-7.38 (d, J = 8 Hz, 1H), 7.82-7.84 (d, J = 12 Hz, 2H); <sup>13</sup>C NMR (75 MHz, CDCl<sub>3</sub>): δ = 21.56, 62.82, 76.58, 115.94, 122.46, 126.41, 128.34, 132.15, 132.44, 133.02, 141.97, 146.82, 158.94; HRMS for C<sub>15</sub>H<sub>12</sub>ClNO ([M+H]<sup>+</sup>: calculated 258.0641, found: 258.0702.

Synthesis of 3-([1,1'-biphenyl]-4-yl)-7-chloro-2H-benzo[b][1,4]oxazine (CA39):

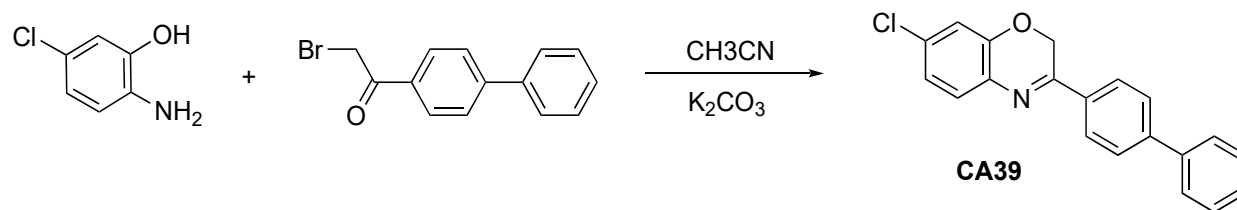

In a 20mL screw-cap vial with stir bar, 2-amino-5-chlorophenol (1 g, 6.96 mmol) in acetonitrile (40 mL) potassium carbonate (1.92 g, 13.92 mmol) was added. To this mixture 1-(4-(biphenyl)-4-yl)-2-bromoethan-1-one (2.15 g, 8.36 mmol) in acetonitrile (20 mL) was added dropwise at room temperature. The reaction mixture was then stirred overnight at room temperature. TLC analysis

of a reaction aliquot (water/EtOAc micro-workup) indicated full conversion. Then the solvent was evaporated and the residue was dissolved in dichloromethane (20 mL). The organic layer was washed with water, brine and dried over Na<sub>2</sub>SO<sub>4</sub>. The desired compound was isolated through silica gel chromatography (hexanes/ ethyl acetate: 15/1). Recrystallization with isopropanol gave a pale yellow powder (CA39; 1.2 g, 53.9%).

CA39 : <sup>1</sup>H-NMR (600 MHz, dms<sub>o</sub>-d<sub>6</sub>): δ 8.10 (d, *J* = 8.5 Hz, 2H), 7.84 (d, *J* = 8.5 Hz, 2H), 7.76 (dd, *J* = 8.3, 1.1 Hz, 2H), 7.51 (t, *J* = 7.7 Hz, 2H), 7.42 (t, *J* = 7.4 Hz, 1H), 7.39 (d, *J* = 8.1 Hz, 1H), 7.09–7.07 (m, 2H), 5.28 (s, 2H). <sup>13</sup>C-NMR (151 MHz, CDCl<sub>3</sub>): δ 159.3, 147.0, 142.9, 139.0, 133.4, 132.4, 131.8, 129.0, 128.4, 128.1, 127.3, 126.81, 126.73, 122.1, 115.5, 62.5. HRMS for C<sub>20</sub>H<sub>14</sub>ClNO, M+H : calculated: 320.0837, found: 320.0839

Synthesis of *N*-(4-(7-chloro-2H-benzo[*b*][1,4]oxazin-3-yl)phenyl)acetamide (CA77):

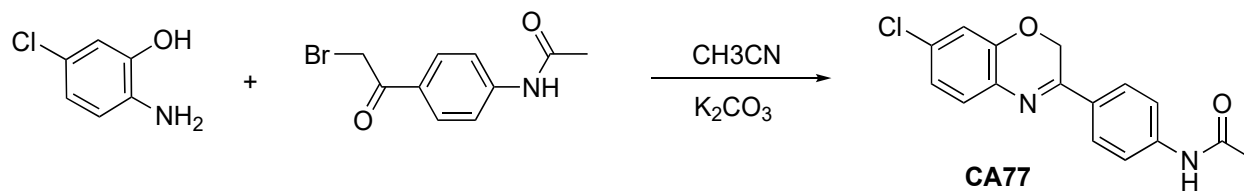

Following a procedure analogous to the procedure described for CA39, using 2-amino-5-chlorophenol (1.02 g, 7.1 mmol) and *N*-(4-(2-bromoacetyl)phenyl)acetamide (2 g, 7.8 mmol) in acetonitrile under reflux overnight. Recrystallization with isopropanol gave the desired compound as white solid (CA77, 560 mg, 26.2%).

CA77 : <sup>1</sup>H-NMR (600 MHz, dms<sub>o</sub>-d<sub>6</sub>): δ 10.24 (s, 1H), 7.96 (d, *J* = 8.8 Hz, 2H), 7.72 (d, *J* = 8.8 Hz, 2H), 7.33 (d, *J* = 8.8 Hz, 1H), 7.07–7.05 (m, 2H), 5.20 (s, 2H), 2.08 (s, 3H). <sup>13</sup>C-NMR (151 MHz, CDCl<sub>3</sub>): δ 168.8, 159.1, 147.0, 142.4, 132.6, 131.4, 128.9, 128.1, 127.7, 122.1, 118.5, 115.6, 62.4,



24.2. HRMS for  $C_{16}H_{13}ClN_2O_2$ , M+H: calculated: 301.0738, found: 301.0741.

Synthesis of perfluorophenyl 4-(7-chloro-2*H*-benzo[*b*][1,4]oxazin-3-yl)benzoate.

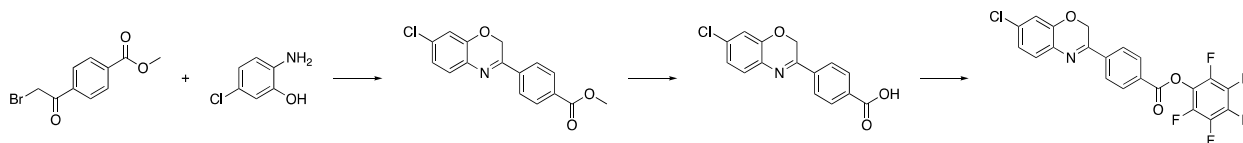

To 2-amino-5-chlorophenol (2.6 g, 10.11 mmol) in dichloromethane (50 mL) was added  $K_2CO_3$  (2.79 g, 20.22 mmol), tetrabutylammonium bisulfate (171.6 mg, 0.5 mmol). Into this, methyl 4-(2-bromoacetyl)benzoate (1.6 mg, 11.12 mmol) in dichloromethane (50 mL) was added dropwise at room temperature. The reaction was then stirred overnight under reflux. The reaction was washed with water, brine and dried over  $Na_2SO_4$ . The desired compound was isolated through silica gel chromatography. Recrystallization with hot ethanol gave a pink-yellow powder methyl 4-(7-chloro-2*H*-benzo[*b*][1,4]oxazin-3-yl)benzoate 1.8 g, yield 59%.

$^1H$ -NMR (300 MHz,  $CDCl_3$ ):  $\delta$  8.14 (d,  $J$  = 0.02 Hz, 2H), 7.98 (d,  $J$  = 0.03 Hz, 2H), 7.37 (d,  $J$  = 0.02 Hz, 1H), 7.02 (d,  $J$  = 0.03 Hz, 1H), 6.93 (s, 1H), 5.08 (s, 2H), 3.95 (s, 3H). HRMS: for  $C_{16}H_{12}ClNO_3$  (M+H): calculated 302.0578, found: 302.0580.

Then methyl 4-(7-chloro-2*H*-benzo[*b*][1,4]oxazin-3-yl)benzoate (1.5 g, 4.97 mmol) was stirred with 1 N LiOH (aq). (49.7 mmol, 1.19g) in 20 mL THF at room temperature for 4 hours. THF was removed under reduced pressure followed by slow addition of 4 N HCl and a white solid 4-(7-chloro-2*H*-benzo[*b*][1,4]oxazin-3-yl)benzoic acid precipitated. The precipitate was filtered and washed with cold EtOH and dried in air (quantitative yield).

$^1\text{H-NMR}$  (300 MHz,  $\text{dms}\text{-d}_6$ ):  $\delta$  13.23 (s, 1H), 8.04-8.13 (m, 4H), 7.42 (d,  $J= 0.03$  Hz, 1H), 7.10 (d,  $J= 0.01$  Hz, 2H), 5.29 (s, 2H). HRMS for  $\text{C}_{15}\text{H}_{10}\text{ClNO}_3$  (M+H): calculated 288.0422, found: 288.0421.

Without further purification, 4-(7-chloro-2*H*-benzo[*b*][1,4]oxazin-3-yl)benzoic acid (1 g, 3.47 mmol) reacts with pentafluorophenyl trifluoroacetate (1 mL, 1.65 g, 5.9 mmol), triethylamine (0.84 mL, 6.07 mmol) in dry DMF under  $\text{N}_2$  at room temperature. Ethyl acetate (40 mL) was added to dilute the reaction mixture which was washed with water, brine and dried over  $\text{Na}_2\text{SO}_4$ . The desired compound was isolated through silica gel chromatography. A yellow solid perfluorophenyl 4-(7-chloro-2*H*-benzo[*b*][1,4]oxazin-3-yl)benzoate was obtained 1.18g, yield 74.9%.

$^1\text{H-NMR}$  (300 MHz,  $\text{dms}\text{-d}_6$ ):  $\delta$  ppm: 8.24-8.34 (m,  $J= 0.03$  Hz, 4H), 7.43 (d,  $J= 0.03$  Hz, 1H), 7.11-7.13 (d,  $J= 0.02$  Hz, 2H), 5.35 (s, 2H), HRMS for  $\text{C}_{21}\text{H}_9\text{ClF}_5\text{NO}_3$  (M+H): calculated 454.0264, found: 454.0271.

Synthesis of 4-(7-chloro-2*H*-benzo[*b*][1,4]oxazin-3-yl)-*N*-(15-oxo-19-((4*S*)-2-oxohexahydro-1*H*-thieno[3,4-*d*]imidazol-4-yl)-4,7,10-trioxa-14-azanonadecyl)benzamide (Biotin-CA)

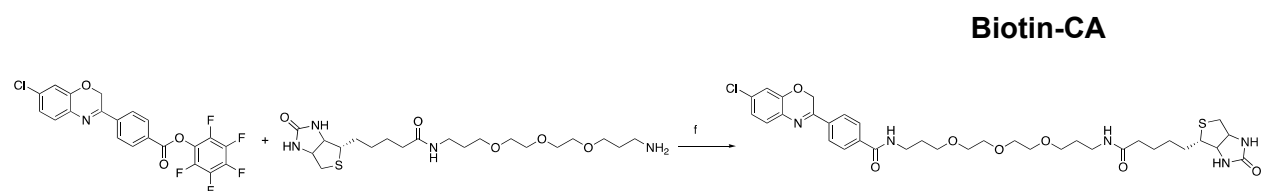

To Biotin-PEG-amine (*N*-(3-(2-(2-(3-aminopropoxy)ethoxy)ethoxy)propyl)-5-((4*S*)-2-oxohexahydro-1*H*-thieno[3,4-*d*]imidazol-4-yl)pentanamide (0.98 g, 2.2 mmol) in dry DMF (15 mL) was added triethylamine (0.61mL, 4.4 mmol) under  $\text{N}_2$ . Then perfluorophenyl 4-(7-chloro-2*H*-benzo[*b*][1,4]oxazin-3-yl)benzoate (1 g, 2.2 mmol) in dry dichloromethane (25 mL) was added

dropwise. The mixture was stirred at room temperature overnight. All solvent was removed under reduced pressure to give a dark oily mixture which was washed with ethyl acetate, ethyl acetate/methanol (10/1). The residue was purified on silica gel (ethyl acetate/ methanol, 10/1, with 1% NH<sub>3</sub>:H<sub>2</sub>O) to provide a yellow solid 0.91 g, yield 58.1%.

Biotin-CA: <sup>1</sup>H-NMR (600 MHz, dms<sub>o</sub>-d<sub>6</sub>): δ 8.59 (d, *J*= 0.01 Hz, 1 H), 8.07 (d, *J*= 0.01 Hz, 2 H), 7.96 (d, *J*= 0.01 Hz, 2 H), 7.73 (s, 1 H), 7.39 (d, *J*= 0.01 Hz, 1 H), 7.08 (m, 1 H), 6.41 (s, 1 H), 6.35 (s, 1 H), 5.28 (s, 2 H), 4.29 (t, *J*= 0.01 Hz, 1 H), 4.10 (t, *J*= 0.01 Hz, 1 H), 3.46-3.54 (m, 11 H), 3.32-3.39 (m, 5H), 3.07 (m, 3 H), 2.80 (dd, *J*<sub>1</sub>= 0.01, *J*<sub>2</sub>= 0.02 Hz, 1H), 2.56 (d, *J*=0.02, 1H), 2.03 (t, *J*= 0.01 Hz, 2 H), 1.78 (m, 2 H), 1.60 (m, 3 H), 1.49 (m, 3 H), 1.28 (m, 3 H). HRMS for C<sub>35</sub>H<sub>46</sub>ClN<sub>5</sub>O<sub>7</sub>S (M+H): calculated 716.2879, found: 716.2887.

**Supplementary Table 1. CA-mediated transcriptional changes.**

| Gene Identifier            | Gene Symbol   | Log2 scale |         |         | P-value (Differentially) |         |         | Direction | P<0.01               |
|----------------------------|---------------|------------|---------|---------|--------------------------|---------|---------|-----------|----------------------|
|                            |               | AR7        | CA39    | CA77    | AR7                      | CA39    | CA77    |           |                      |
| NM_019465                  | Crtam         | 0.0295     | 0.02443 | 0.02383 | 8.5E-05                  | 7.8E-05 | 7.6E-05 | Down      | With the 3 compounds |
| NM_152802                  | Defb12        | 0.01552    | 0.01369 | 0.01656 | 0.00137                  | 0.00139 | 0.0014  | Down      |                      |
| chr13:64044376-64045368_R  | Non-coding    | 0.17775    | 0.15702 | 0.1362  | 0.00255                  | 0.00193 | 0.00142 | Down      |                      |
| AY170623                   | Dsg4          | 0.04227    | 0.04187 | 0.02136 | 0.00231                  | 0.00241 | 0.00176 | Down      |                      |
| NM_007941                  | Stx2          | 0.06594    | 0.11796 | 0.09232 | 0.00118                  | 0.00263 | 0.00182 | Down      |                      |
| chr12:52944867-52971992_R  | Non-coding    | 0.05586    | 0.02965 | 0.03376 | 0.00386                  | 0.00292 | 0.00298 | Down      |                      |
| NM_010482                  | Htr1b         | 0.02601    | 0.02191 | 0.04553 | 0.0032                   | 0.0032  | 0.00416 | Down      |                      |
| chr16:44717531-44724206_F  | Non-coding    | 0.02202    | 0.01733 | 0.03891 | 0.00435                  | 0.00435 | 0.0054  | Down      |                      |
| chr5:54053328-54053870_F   | Non-coding    | 0.08925    | 0.08567 | 0.08612 | 0.00448                  | 0.00452 | 0.0045  | Down      |                      |
| NR_024017                  | 4930594C11Rik | 0.02681    | 0.02758 | 0.0118  | 0.00487                  | 0.0052  | 0.00413 | Down      |                      |
| chr6:36765550-36793825_F   | Non-coding    | 0.04136    | 0.01728 | 0.01829 | 0.00654                  | 0.0053  | 0.00512 | Down      |                      |
| ENSMUST00000097448         | Anti-sense    | 0.03891    | 0.03251 | 0.02606 | 0.00671                  | 0.00663 | 0.00591 | Down      |                      |
| chr1:64232564-64349617_R   | Non-coding    | 0.03837    | 0.044   | 0.03926 | 0.00658                  | 0.00742 | 0.00678 | Down      |                      |
| NM_010446                  | Foxa2         | 0.06131    | 0.05303 | 0.03773 | 0.009                    | 0.00877 | 0.00715 | Down      |                      |
| chr15:83266264-83294664_F  | Non-coding    | 0.05281    | 0.07415 | 0.06682 | 0.00758                  | 0.01011 | 0.00909 | Down      | AR7, A77             |
| NM_008706                  | Nqo1          | 4.84289    | 1.29983 | 4.96787 | 0.00024                  | 0.44799 | 0.00023 | Up        |                      |
| NM_010357                  | Gsta4         | 26.5846    | 2.33075 | 18.7705 | 2.5E-06                  | 0.038   | 4.9E-06 | Up        |                      |
| NM_001122668               | E330014E10Rik | 26.1281    | 1.58381 | 33.8974 | 0.00483                  | 0.82855 | 0.00427 | Up        |                      |
| CK334688                   | AU017674      | 7.51339    | 18.0101 | 22.5451 | 0.06589                  | 0.00596 | 0.00379 | Up        | CA39, CA77           |
| chr1:138570107-138632310_F | Non-coding    | 1.40947    | 7.86325 | 6.31921 | 0.49282                  | 0.0002  | 0.00067 | Up        |                      |
| chr1:138570107-138632310_F | Non-coding    | 1.40947    | 7.86325 | 6.31921 | 0.49282                  | 0.0002  | 0.00067 | Up        |                      |
| chr16:39984031-40081556_R  | Non-coding    | 0.54799    | 0.39078 | 0.07815 | 0.04968                  | 0.00497 | 5.3E-06 | Down      |                      |
| XR_168418                  | Gm5106        | 0.42622    | 0.28915 | 0.09934 | 0.01916                  | 0.00244 | 6.1E-05 | Down      |                      |
| NM_181418                  | Ushbp1        | 0.21988    | 0.18982 | 0.16476 | 0.01199                  | 0.00887 | 0.00665 | Down      |                      |
| chr11:70196232-70203307_R  | Non-coding    | 0.18851    | 0.13334 | 0.14295 | 0.01035                  | 0.00566 | 0.00642 | Down      |                      |
| NM_178689                  | Eno4          | 0.1098     | 0.10788 | 0.23172 | 0.00575                  | 0.00594 | 0.02332 | Down      | AR7, CA77            |

Ratio of expression relative to untreated cells (in Log2 scale) and p values of genes showing significant changes in expression upon treatment of NIH3T3 cells with AR7, CA39 or CA77 (for details see Fig 2d and Methods). Genes are grouped according to the number of compounds for which they show significantly different expression than untreated cells (indicated under p<0.01, blue column). Upregulation or downregulated expression is indicated as Up or Down, respectively under direction. Two-sided unpaired t-test was used for comparison with untreated.

**Supplementary Table 2. Sequence of forward (F) and reverse (R) primers used for qPCR**

|                |                                                                        |
|----------------|------------------------------------------------------------------------|
| Lamp2a         | F-5'-GCAGTGCAGATGAAGACAAC-3'<br>R-5'-AGTATGATGGCGCTTGAGAC-3'           |
| <i>β-actin</i> | F-5'-AA GGACTCCTA TAGTGGG TGACGA-3'<br>R-5'-ATCTTCTCCATGTCTGCCAGTTG-3' |
| PHLPP1         | F-5'-AGCTTCCCGGCAAGTA AAAT-3'<br>R-5'-GGTGGCAGGTTTTCTGGTAA-3'          |
| Dendra2        | F-5'-AAGGGCATCTGCACCATCCG-3'<br>R-5'-CGTGCTCG TACAGCTTCACCTTG-3'       |
| GFAP           | F-5'-CGGAGACGCATCACCTCTG-3',<br>R-5'-TGGAGGAGTCATTCGAGACAA-3'          |
| HSC70          | F-5'-TCTCGGCACCACCTACTCC-3'<br>R-5'-CCCGCATCAGACGTTTGGCA-3'            |
| HSP40          | F-5'-TTCGACCGCTATGGAGAGGAA-3'<br>R-5'-CACCGAAGAACTCAGCAAACA-3'         |
| HSP90AA1       | F-5'-GACGCTCTGGATAAAATCCGTT-3'<br>R-5'-TGGGAATGAGATTGATGTGCAG-3'       |
| HSP90AB1       | F-5'-AAACAAGGAGATTTTCCCTCCGC-3'<br>R-5'-CCGTCAGGCTCTCATATCGAAT-3'      |
| NCOR1          | F-5'-CCCATTTCCACCGTGTTAGTG-3'<br>R-5'-AAGGTGAAGCATTGTTGGTCATCT-3'      |
| RAC1           | F-5'-ACGGAGCTGTTGGTAAAACCT-3'<br>R-5'-AGACGGTGGGGATGTACTCTC-3'         |
| RARa           | F-5'-CTAGCCGATTTGCACGGATG-3'<br>R-5'-GGGTCTCGATGGAGTGGTTT-3'           |
| AKT1           | F-5'-ATCCCCTCCAACAACCTTCTCAGT-3'<br>R-5'-CCTTCCCGTCCACTCTTCTTTTC-3'    |
| AKT2           | F-5'-ACGTGGTGAATACATCAAGACC-3'<br>R-5'-GGGCCTCTCCTTATACCCAAT-3'        |
| CTSA           | F-5'-CAGCCCTCTTCCGGCAATA-3'<br>R-5'-TTTGGGTCGTTCTGCGACTC-3'            |
| NFATc1         | F-5'-GGAGAGTCCGAGAATCGAGAT-3'<br>R-5'-TTGCAGCTAGGAAGTACGTCT-3'         |
| NFe2L2         | F-5'-CTTTAGTCAGCGACAGAAGGAC-3'<br>R-5'-AGGCATCTTGTTTGGGAATGTG-3'       |
| Rab11a         | F-5'-AGGAGCGGTACAGGGCTATAA-3'<br>R-5'-ATGTGAGATGCTTAGCAATGTCA-3'       |
| LAMP1          | F-5'-TAGTGCCACATTCAGCATCTCCA-3'<br>R-5'-TTCCACAGACCCAAACCTGTCACT-3'    |
| LAMP2B         | F-5'-GGTGCTGGTCTTTCAGGCTTGATT-3'<br>R-5'-ACCACCAATCTAAGAGCAGGACT-3'    |
| LAMP2C         | F-5'-ATGTGCTGCTGACTCTGACCTCAA-3'<br>R-5'-TGGAAGCACGAGACTGGCTTGATT-3'   |
| RICTOR         | F-5'-GCTGCGCTATCTCATCCAAGA-3'<br>R-5'-GGGTTCTGAAGTGCTAGTTCAC-3'        |
| B2M            | F-5'-CACTGAATTCACCCCACTGA-3'<br>R-5'-TCACATGTCTCGATCCCAGT-3'           |
| TBP            | F-5'-GAAGCTGCGGTACAATCCAG-3'<br>R-5'-CCCCTTGACCCTTCACCSAAT-3'          |
| EEF1A1         | F-5'-GAAGATCGGCTACAACCCAG-3'<br>R-5'-CTTCCTTACGCTCTACTTTCCAG-3'        |
